# Supplementary material
Source: publisher figshare collection journal article supplement (https://gsapubs.figshare.com/ndownloader/files/23304182)
Supplement: Supplementary file 1 [file 23304182]

## Sheet: Table DR1
Table DR1: Microprobe data for all volcanic glasses seperated from sediment core AT26-19-12PC (LDEO core repository) (see Methods)
Depth in core (mbsf)			Composition (wt%)
Max	Min	Chip No.	MgO	TiO2	K2O	P2O5	FeO	Age (ka)
4.817	4.807	1	5.57	2.71	0.215	0.289	14.57	546.96
4.817	4.807	2	5.65	2.61	0.199	0.271	14.06	546.96
4.827	4.817	1	5.83	2.68	0.215	0.269	14.57	547.71
4.867	4.857	1	5.74	2.66	0.202	0.271	14.54	551.96
4.877	4.867	1	6.19	2.59	0.201	0.29	14.44	553.02
4.887	4.877	1	5.84	2.91	0.211	0.306	15.2	554.09
4.887	4.877	2	6.24	2.59	0.192	0.282	14.21	554.09
4.887	4.877	3	6.11	2.69	0.226	0.303	14.76	554.09
4.887	4.877	4	5.8	2.67	0.204	0.278	14.46	554.09
4.897	4.887	1	5.76	2.98	0.212	0.313	15.68	555.15
4.897	4.887	2	5.8	2.67	0.206	0.287	14.31	555.15
4.907	4.897	1	6.09	2.59	0.201	0.284	14.35	556.22
4.907	4.897	2	5.9	2.54	0.19	0.263	13.8	556.22
4.907	4.897	3	5.8	2.51	0.192	0.259	13.43	556.22
4.907	4.897	4	5.53	2.79	0.218	0.311	14.32	556.22
4.907	4.897	5	5.53	2.81	0.219	0.312	14.41	556.22
4.917	4.907	1	5.8	2.65	0.244	0.288	14.36	557.28
4.917	4.907	2	5.73	2.57	0.209	0.272	13.86	557.28
4.917	4.907	3	5.91	2.91	0.232	0.316	14.91	557.28
4.917	4.907	4	6.19	2.56	0.213	0.311	14.18	557.28
4.917	4.907	5	5.68	2.57	0.2	0.271	14.04	557.28
4.917	4.907	6	4.91	2.61	0.22	0.28	14.35	557.28
4.917	4.907	7	5.52	2.7	0.208	0.28	14.51	557.28
4.917	4.907	8	6.21	2.78	0.18	0.277	14.83	557.28
4.937	4.927	1	5.72	2.83	0.221	0.302	14.64	559.41
4.937	4.927	2	5.7	2.84	0.223	0.305	14.73	559.41
4.937	4.927	3	5.91	2.83	0.192	0.284	14.92	559.41
4.937	4.927	4	5.66	2.67	0.205	0.281	14.46	559.41
4.937	4.927	5	6.14	2.6	0.206	0.287	14.35	559.41
4.937	4.927	6	5.66	2.6	0.207	0.28	14.22	559.41
4.937	4.927	7	6.1	2.59	0.239	0.276	14.17	559.41
4.937	4.927	8	5.53	2.62	0.199	0.277	14.19	559.41
4.937	4.927	9	5.49	2.59	0.206	0.276	13.98	559.41
4.957	4.947	1	5.69	2.6	0.221	0.282	14.09	561.53
4.957	4.947	2	5.69	2.65	0.204	0.278	14.6	561.53
4.957	4.947	3	6.06	2.53	0.199	0.274	14.04	561.53
4.957	4.947	4	6.5	2.06	0.161	0.215	12.95	561.53
4.957	4.947	5	6.01	2.63	0.21	0.295	14.25	561.53
4.957	4.947	6	5.82	2.62	0.205	0.284	14.35	561.53
4.957	4.947	7	6.09	2.53	0.204	0.281	13.97	561.53
4.957	4.947	8	6.04	2.71	0.207	0.284	14.38	561.53
4.957	4.947	9	6.1	2.61	0.256	0.291	14.4	561.53
4.967	4.957	1	6.01	2.53	0.205	0.295	13.88	563.24
4.967	4.957	2	6.11	2.54	0.191	0.266	13.93	563.24
4.967	4.957	3	5.43	2.62	0.203	0.279	14.27	563.24
4.967	4.957	4	6.03	2.52	0.201	0.29	13.96	563.24
4.967	4.957	5	6.2	2.48	0.192	0.262	13.56	563.24
4.967	4.957	6	6.13	2.58	0.198	0.274	14.29	563.24
4.967	4.957	7	6.01	2.51	0.209	0.3	13.93	563.24
4.967	4.957	8	6.07	2.76	0.187	0.263	14.67	563.24
4.967	4.957	9	5.99	2.53	0.195	0.269	13.95	563.24
4.977	4.967	1	6.19	2.52	0.192	0.265	13.96	564.86
4.977	4.967	2	6.14	2.53	0.194	0.265	13.96	564.86
4.977	4.967	3	5.75	2.62	0.204	0.265	14.31	564.86
4.977	4.967	4	6.09	2.74	0.179	0.276	14.49	564.86
4.977	4.967	5	6	2.63	0.197	0.276	14.42	564.86
4.977	4.967	6	6.07	2.54	0.198	0.28	14	564.86
4.977	4.967	7	4.46	2.74	0.249	0.295	15.24	564.86
4.977	4.967	8	5.81	2.56	0.199	0.267	14.04	564.86
4.977	4.967	9	5.68	2.59	0.197	0.267	14.16	564.86
4.987	4.977	1	6.19	2.51	0.192	0.274	13.94	566.47
4.987	4.977	2	5.65	2.89	0.221	0.305	15.18	566.47
4.987	4.977	3	5.83	2.66	0.202	0.273	14.45	566.47
4.987	4.977	4	5.8	2.58	0.197	0.266	14.02	566.47
4.987	4.977	5	5.71	2.59	0.198	0.274	14.01	566.47
4.987	4.977	6	6.18	2.52	0.19	0.256	14.01	566.47
4.987	4.977	7	6.15	2.52	0.198	0.279	13.92	566.47
4.987	4.977	8	5.78	2.57	0.193	0.274	14.01	566.47
4.997	4.987	1	6.28	2.52	0.192	0.258	13.88	568.08
4.997	4.987	2	5.51	2.59	0.206	0.272	13.96	568.08
4.997	4.987	3	6.38	2.6	0.2	0.267	14.33	568.08
4.997	4.987	4	5.6	2.61	0.203	0.274	14.04	568.08
4.997	4.987	5	6.24	2.51	0.194	0.263	13.88	568.08
4.997	4.987	6	6.26	2.52	0.196	0.261	13.9	568.08
5.007	4.997	1	6.1	2.52	0.191	0.269	13.94	569.7
5.007	4.997	2	6.08	2.52	0.193	0.265	13.96	569.7
5.007	4.997	3	6.15	2.58	0.203	0.29	14.31	569.7
5.007	4.997	4	6.01	2.52	0.193	0.257	13.92	569.7
5.007	4.997	5	5.94	2.51	0.203	0.297	13.84	569.7
5.017	5.007	1	6.07	2.51	0.191	0.262	13.9	571.31
5.017	5.007	2	6.13	2.52	0.188	0.255	13.89	571.31
5.017	5.007	3	6.12	2.51	0.192	0.256	13.63	571.31
5.017	5.007	4	6.18	2.55	0.191	0.26	13.98	571.31
5.017	5.007	5	6.07	2.51	0.188	0.257	13.92	571.31
5.017	5.007	6	6.12	2.52	0.19	0.261	13.95	571.31
5.017	5.007	7	6.09	2.53	0.191	0.26	13.96	571.31
5.027	5.017	1	5.87	2.58	0.198	0.275	14.13	572.92
5.027	5.017	2	6.29	2.57	0.21	0.32	14.17	572.92
5.027	5.017	3	6.17	2.58	0.202	0.284	14.4	572.92
5.027	5.017	4	5.75	2.57	0.199	0.279	14.07	572.92
5.027	5.017	5	5.79	2.62	0.201	0.28	14.37	572.92
5.027	5.017	6	5.67	2.95	0.246	0.332	14.98	572.92
5.027	5.017	7	5.63	2.6	0.211	0.277	14.19	572.92
5.027	5.017	8	5.78	2.57	0.2	0.282	14.18	572.92
5.037	5.027	1	5.99	2.52	0.194	0.261	14	574.53
5.037	5.027	2	6.35	2.41	0.158	0.241	13.5	574.53
5.037	5.027	3	5.89	2.71	0.191	0.285	14.47	574.53
5.037	5.027	4	6.46	2.43	0.159	0.242	13.53	574.53
5.037	5.027	5	6.08	2.82	0.185	0.279	14.94	574.53
5.037	5.027	6	6.04	2.72	0.175	0.275	14.4	574.53
5.037	5.027	7	6.06	2.63	0.2	0.26	14.27	574.53
5.037	5.027	8	7	1.89	0.127	0.178	12.04	574.53
5.037	5.027	9	5.93	2.85	0.224	0.305	14.94	574.53
5.047	5.037	1	6.03	2.52	0.201	0.281	13.93	576.15
5.047	5.037	2	5.73	2.82	0.228	0.305	14.61	576.15
5.047	5.037	3	6.1	2.57	0.206	0.287	14.17	576.15
5.047	5.037	4	6.54	2.32	0.163	0.218	13.58	576.15
5.047	5.037	5	5.81	2.91	0.226	0.313	14.97	576.15
5.047	5.037	6	6.09	2.84	0.183	0.286	14.96	576.15
5.047	5.037	7	6.08	2.83	0.188	0.282	15.06	576.15
5.047	5.037	8	6.08	2.83	0.185	0.284	14.99	576.15
5.057	5.047	1	5.89	2.76	0.183	0.274	14.55	577.76
5.057	5.047	2	5.9	2.8	0.218	0.308	14.95	577.76
5.057	5.047	3	5.91	2.75	0.18	0.283	14.54	577.76
5.057	5.047	4	5.9	2.75	0.177	0.279	14.52	577.76
5.057	5.047	5	5.9	2.73	0.207	0.298	14.69	577.76
5.057	5.047	6	6.03	2.53	0.167	0.274	14.06	577.76
5.057	5.047	7	6.57	2.38	0.183	0.25	13.66	577.76
5.057	5.047	8	5.78	2.76	0.213	0.307	14.5	577.76
5.057	5.047	9	6.74	1.84	0.137	0.187	11.43	577.76
5.067	5.057	1	6.06	2.5	0.17	0.251	14	579.37
5.067	5.057	2	7.74	1.62	0.107	0.158	11.4	579.37
5.067	5.057	3	5.87	2.9	0.183	0.295	15.26	579.37
5.067	5.057	4	7.8	1.63	0.132	0.162	11.36	579.37
5.067	5.057	5	7.74	1.63	0.125	0.164	11.46	579.37
5.067	5.057	6	7.85	1.63	0.131	0.162	11.35	579.37
5.067	5.057	7	6.59	2.46	0.158	0.263	13.82	579.37
5.077	5.067	1	5.99	2.87	0.172	0.304	15.18	580.98
5.077	5.067	2	6.75	1.97	0.139	0.192	12.26	580.98
5.077	5.067	3	6.57	2.49	0.141	0.255	13.9	580.98
5.077	5.067	4	5.57	2.9	0.213	0.305	15.23	580.98
5.077	5.067	5	6.1	2.85	0.177	0.285	15.1	580.98
5.077	5.067	6	6.29	2.47	0.171	0.256	13.75	580.98
5.077	5.067	7	5.98	2.77	0.17	0.281	14.67	580.98
5.077	5.067	8	6.16	2.75	0.178	0.288	14.77	580.98
5.077	5.067	9	6.11	2.79	0.176	0.289	14.82	580.98
5.087	5.077	1	6.08	2.81	0.177	0.296	15.04	582.6
5.087	5.077	2	5.85	2.73	0.182	0.292	14.44	582.6
5.087	5.077	3	6.77	2.08	0.145	0.209	12.5	582.6
5.087	5.077	4	6.08	2.83	0.173	0.296	15.02	582.6
5.087	5.077	5	6	2.9	0.189	0.289	15.32	582.6
5.087	5.077	6	5.93	2.77	0.182	0.283	14.77	582.6
5.087	5.077	7	6.05	2.84	0.182	0.301	15.12	582.6
5.087	5.077	8	5.73	2.69	0.214	0.302	14.54	582.6
5.097	5.087	1	6.34	2.53	0.219	0.27	14.11	584.21
5.097	5.087	2	6	2.71	0.173	0.282	14.47	584.21
5.097	5.087	3	6.5	2.06	0.139	0.202	13.05	584.21
5.097	5.087	4	6.09	2.57	0.229	0.262	14.3	584.21
5.097	5.087	5	6.04	2.84	0.184	0.288	14.96	584.21
5.097	5.087	6	6.51	2.48	0.159	0.256	13.94	584.21
5.097	5.087	7	6.16	2.77	0.173	0.29	14.82	584.21
5.097	5.087	8	6.35	2.38	0.157	0.248	13.45	584.21
5.107	5.097	1	6.04	2.84	0.176	0.3	14.88	585.82
5.107	5.097	2	6.21	2.77	0.175	0.284	14.73	585.82
5.107	5.097	3	6.11	2.72	0.177	0.278	14.46	585.82
5.107	5.097	4	6.33	2.55	0.177	0.264	14.2	585.82
5.107	5.097	5	6.06	2.7	0.17	0.281	14.35	585.82
5.107	5.097	6	6.49	2.45	0.156	0.244	13.72	585.82
5.107	5.097	7	5.92	2.76	0.175	0.286	14.61	585.82
5.107	5.097	8	6.06	2.7	0.17	0.283	14.33	585.82
5.117	5.107	1	5.95	2.78	0.18	0.284	14.68	587.43
5.117	5.107	2	5.88	2.78	0.182	0.284	14.72	587.43
5.117	5.107	3	6.1	2.7	0.174	0.275	14.41	587.43
5.117	5.107	4	6.12	2.51	0.17	0.247	13.99	587.43
5.117	5.107	5	5.59	2.82	0.191	0.298	14.72	587.43
5.117	5.107	6	6.1	2.71	0.172	0.273	14.47	587.43
5.117	5.107	7	5.86	2.73	0.182	0.279	14.44	587.43
5.117	5.107	8	6.07	2.72	0.173	0.28	14.43	587.43
5.117	5.107	9	6.47	2.44	0.159	0.254	13.64	587.43
5.127	5.117	1	5.95	2.88	0.189	0.301	15.16	589.05
5.127	5.117	2	6.39	2.42	0.163	0.264	13.59	589.05
5.127	5.117	3	6.25	2.48	0.183	0.261	13.88	589.05
5.127	5.117	4	6.5	2.07	0.141	0.208	13.1	589.05
5.127	5.117	5	6.1	2.71	0.176	0.291	14.45	589.05
5.127	5.117	6	6.25	2.55	0.166	0.268	13.87	589.05
5.127	5.117	7	6.38	2.51	0.164	0.26	14.01	589.05
5.127	5.117	8	6.42	2.4	0.158	0.253	13.5	589.05
5.127	5.117	9	6.02	2.71	0.175	0.29	14.4	589.05
5.137	5.127	1	5.98	2.54	0.185	0.26	13.9	590.16
5.137	5.127	2	6.06	2.8	0.183	0.283	14.97	590.16
5.137	5.127	3	5.89	2.88	0.186	0.293	15.29	590.16
5.137	5.127	4	5.91	2.77	0.181	0.283	14.62	590.16
5.137	5.127	5	6.03	2.85	0.184	0.29	15.16	590.16
5.137	5.127	6	5.73	2.85	0.184	0.291	14.87	590.16
5.137	5.127	7	6.09	2.71	0.173	0.286	14.36	590.16
5.137	5.127	8	6.15	2.78	0.239	0.282	14.66	590.16
5.147	5.137	1	5.84	2.74	0.174	0.274	14.39	590.52
5.147	5.137	2	5.93	2.52	0.177	0.248	13.82	590.52
5.147	5.137	3	5.6	2.85	0.186	0.283	14.92	590.52
5.147	5.137	4	6.11	2.46	0.176	0.257	13.54	590.52
5.147	5.137	5	6.01	2.48	0.18	0.252	13.66	590.52
5.167	5.157	1	6.01	2.56	0.176	0.244	14.35	591.25
5.167	5.157	2	5.66	2.82	0.183	0.279	14.72	591.25
5.167	5.157	3	5.94	2.52	0.173	0.242	13.95	591.25
5.167	5.157	4	5.86	2.73	0.175	0.273	14.39	591.25
5.167	5.157	5	5.9	2.5	0.17	0.238	13.9	591.25
5.167	5.157	6	6.58	2.12	0.146	0.202	12.66	591.25
5.187	5.177	1	6.07	2.52	0.165	0.247	14.1	591.99
5.187	5.177	2	6.34	2.42	0.167	0.242	13.59	591.99
5.187	5.177	3	6.04	2.73	0.166	0.273	14.42	591.99
5.187	5.177	4	5.81	2.82	0.179	0.28	14.7	591.99
5.187	5.177	5	6.07	2.49	0.166	0.244	13.89	591.99
5.197	5.187	1	6.26	2.13	0.145	0.201	13.08	592.35
5.197	5.187	2	6.84	2.02	0.149	0.186	12.47	592.35
5.197	5.187	3	6.19	2.45	0.168	0.234	13.71	592.35
5.197	5.187	4	6.58	2.23	0.151	0.206	12.81	592.35
5.197	5.187	5	6.2	2.53	0.172	0.238	14.16	592.35
5.197	5.187	6	4.97	2.57	0.19	0.253	13.99	592.35
5.207	5.197	1	5.86	2.53	0.164	0.243	13.75	592.72
5.207	5.197	2	6.37	2.24	0.149	0.207	13.11	592.72
5.207	5.197	3	6.31	2.55	0.181	0.251	14.12	592.72
5.207	5.197	4	7.24	1.83	0.119	0.172	11.82	592.72
5.207	5.197	5	6.32	2.24	0.152	0.216	13.09	592.72
5.207	5.197	6	6.05	2.49	0.168	0.238	13.89	592.72
5.207	5.197	7	6.06	2.47	0.169	0.239	13.61	592.72
5.207	5.197	8	6.04	2.49	0.166	0.238	13.89	592.72
5.217	5.207	1	6.06	2.68	0.188	0.273	14.61	593.08
5.217	5.207	2	6.21	2.46	0.177	0.242	13.65	593.08
5.217	5.207	3	7.02	1.9	0.124	0.178	12.2	593.08
5.217	5.207	4	6.53	2.06	0.146	0.194	12.9	593.08
5.217	5.207	5	6.55	2.07	0.143	0.193	12.9	593.08
5.217	5.207	6	6.77	2.04	0.141	0.203	12.36	593.08
5.217	5.207	7	6.25	2.51	0.181	0.252	14.06	593.08
5.217	5.207	8	5.96	2.54	0.184	0.255	13.75	593.08
5.227	5.217	1	6.02	2.45	0.178	0.255	13.78	593.45
5.227	5.217	2	6.44	2.1	0.14	0.217	12.86	593.45
5.227	5.217	3	6.35	2.01	0.148	0.217	12.9	593.45
5.227	5.217	4	6.18	2.48	0.185	0.231	13.7	593.45
5.227	5.217	5	7.15	1.88	0.124	0.181	11.59	593.45
5.227	5.217	6	6.58	2.11	0.14	0.18	13.27	593.45
5.237	5.227	1	7.85	1.5	0.1	0.138	10.84	594.09
5.237	5.227	2	7.6	1.57	0.11	0.155	11	594.09
5.237	5.227	3	7.58	1.54	0.111	0.122	10.9	594.09
5.237	5.227	4	7.05	1.87	0.125	0.17	12.02	594.09
5.237	5.227	5	6.99	1.93	0.14	0.175	12.05	594.09
5.247	5.237	1	6.63	2.29	0.169	0.234	12.99	594.63
5.247	5.237	2	7.9	1.5	0.105	0.121	10.84	594.63
5.247	5.237	3	6.22	2.11	0.146	0.165	13.26	594.63
5.247	5.237	4	7.76	1.61	0.103	0.129	11.27	594.63
5.247	5.237	5	7.72	1.62	0.106	0.143	11.05	594.63
5.247	5.237	6	7.77	1.63	0.109	0.131	11.18	594.63
5.257	5.247	1	7.86	1.49	0.101	0.126	10.83	595.17
5.257	5.247	2	7.01	1.95	0.139	0.214	12.32	595.17
5.257	5.247	3	7.84	1.52	0.097	0.127	10.89	595.17
5.257	5.247	4	7.74	1.48	0.112	0.13	11.01	595.17
5.267	5.257	1	7.84	1.49	0.098	0.137	10.73	595.71
5.267	5.257	2	7.57	1.56	0.116	0.136	10.8	595.71
5.267	5.257	3	7.62	1.57	0.11	0.164	10.73	595.71
5.267	5.257	4	7.57	1.57	0.111	0.138	10.79	595.71
5.277	5.267	1	7.07	1.92	0.139	0.18	11.89	596.25
5.277	5.267	2	6.61	2.11	0.143	0.197	13.07	596.25
5.277	5.267	3	6.52	2.08	0.143	0.185	13.19	596.25
5.277	5.267	4	7.56	1.65	0.127	0.166	11.17	596.25
5.277	5.267	5	7.87	1.52	0.101	0.123	10.8	596.25
5.277	5.267	6	7.89	1.52	0.105	0.147	10.94	596.25
5.287	5.277	1	6.56	2.1	0.142	0.193	13.27	596.79
5.287	5.277	2	6.85	2.13	0.156	0.206	12.66	596.79
5.287	5.277	3	6.57	2.1	0.145	0.218	13.28	596.79
5.287	5.277	4	6.78	2.14	0.155	0.212	12.4	596.79
5.297	5.287	1	8.16	1.42	0.093	0.121	10.56	597.33
5.297	5.287	2	7.22	1.86	0.126	0.184	11.93	597.33
5.297	5.287	3	6.68	2.25	0.166	0.23	12.79	597.33
5.297	5.287	4	7.55	1.58	0.115	0.149	10.83	597.33
5.297	5.287	5	6.54	2.08	0.146	0.239	13.23	597.33
5.307	5.297	1	7.33	1.78	0.119	0.173	11.75	597.87
5.307	5.297	2	7.27	1.8	0.124	0.172	11.71	597.87
5.307	5.297	3	7.66	1.56	0.109	0.127	11	597.87
5.307	5.297	4	7.72	1.57	0.101	0.138	11.19	597.87
5.307	5.297	5	7.93	1.5	0.104	0.133	10.92	597.87
5.317	5.307	1	7.65	1.58	0.111	0.149	11.02	598.41
5.317	5.307	2	6.59	2.1	0.147	0.19	12.92	598.41
5.317	5.307	3	7.8	1.52	0.113	0.117	10.89	598.41
5.317	5.307	4	7.66	1.59	0.114	0.155	10.88	598.41
5.327	5.317	1	7.25	1.82	0.124	0.16	11.77	598.95
5.327	5.317	2	7.85	1.51	0.1	0.132	10.81	598.95
5.327	5.317	3	7.75	1.52	0.11	0.138	11.06	598.95
5.327	5.317	4	8.08	1.45	0.097	0.12	10.33	598.95
5.327	5.317	5	7.66	1.59	0.105	0.132	11.19	598.95
5.337	5.327	1	7.87	1.5	0.101	0.134	10.73	599.49
5.337	5.327	2	6.54	2.1	0.139	0.211	13.28	599.49
5.337	5.327	3	8.16	1.41	0.094	0.119	10.39	599.49
5.337	5.327	4	7.89	1.48	0.098	0.116	10.94	599.49
5.347	5.337	1	7.98	1.47	0.099	0.134	10.64	600.03
5.347	5.337	2	8.03	1.45	0.099	0.145	10.59	600.03
5.347	5.337	3	8.16	1.43	0.095	0.118	10.73	600.03
5.347	5.337	4	7.67	1.47	0.106	0.129	10.65	600.03
5.357	5.347	1	7.65	1.57	0.112	0.147	10.83	600.57
5.357	5.347	2	7.78	1.58	0.101	0.138	11.1	600.57
5.357	5.347	3	8.18	1.42	0.095	0.126	10.44	600.57
5.357	5.347	4	6.83	2.09	0.151	0.226	12.43	600.57
5.367	5.357	1	7.71	1.49	0.11	0.143	11.08	601.11
5.367	5.357	2	7.63	1.57	0.117	0.15	10.81	601.11
5.367	5.357	3	7.74	1.48	0.114	0.145	11.03	601.11
5.367	5.357	4	7.69	1.53	0.107	0.133	11.05	601.11
5.377	5.367	1	7.62	1.51	0.112	0.144	11.03	601.65
5.377	5.367	2	7.89	1.5	0.103	0.151	10.75	601.65
5.377	5.367	3	7.84	1.5	0.102	0.151	10.51	601.65
5.377	5.367	4	7.61	1.51	0.111	0.139	10.94	601.65
5.377	5.367	5	7.75	1.47	0.111	0.156	10.94	601.65
5.387	5.377	1	7.54	1.72	0.11	0.163	11.64	602.18
5.387	5.377	2	7.32	1.77	0.132	0.172	11.58	602.18
5.387	5.377	3	7.78	1.58	0.109	0.159	11.15	602.18
5.387	5.377	4	7.72	1.48	0.11	0.146	11.01	602.18
5.387	5.377	5	7.5	1.88	0.139	0.179	11.64	602.18
5.387	5.377	6	7.6	1.71	0.109	0.168	11.47	602.18
5.397	5.387	1	7.66	1.49	0.114	0.132	10.95	602.72
5.397	5.387	2	7.77	1.5	0.115	0.135	10.95	602.72
5.397	5.387	3	7.72	1.58	0.106	0.163	11.23	602.72
5.397	5.387	4	7.51	1.67	0.125	0.159	11.13	602.72
5.397	5.387	5	7.63	1.58	0.108	0.161	10.94	602.72
5.407	5.397	1	7.72	1.48	0.113	0.138	10.86	603.26
5.407	5.397	2	7.85	1.5	0.099	0.155	10.82	603.26
5.407	5.397	3	8.09	1.42	0.098	0.12	10.33	603.26
5.407	5.397	4	7.72	1.49	0.11	0.134	10.85	603.26
5.417	5.407	1	7.86	1.51	0.101	0.137	10.77	603.8
5.417	5.407	2	7.81	1.5	0.108	0.133	10.92	603.8
5.417	5.407	3	7.47	1.67	0.123	0.159	11.35	603.8
5.427	5.417	1	7.68	1.52	0.112	0.14	10.87	604.34
5.427	5.417	2	7.66	1.53	0.114	0.129	10.87	604.34
5.427	5.417	3	7.69	1.5	0.107	0.144	10.82	604.34
5.427	5.417	4	7.8	1.53	0.106	0.143	10.66	604.34
5.437	5.427	1	7.8	1.49	0.101	0.141	10.63	604.88
5.437	5.427	2	7.83	1.5	0.097	0.134	10.87	604.88
5.437	5.427	3	7.77	1.48	0.096	0.135	10.73	604.88
5.437	5.427	4	8.18	1.42	0.092	0.139	10.26	604.88
5.447	5.437	1	7.42	1.65	0.122	0.16	11.1	605.42
5.447	5.437	2	7.51	1.64	0.117	0.161	10.92	605.42
5.447	5.437	3	7.49	1.66	0.124	0.17	10.98	605.42
5.447	5.437	4	7.66	1.57	0.113	0.151	10.84	605.42
5.447	5.437	5	7.89	1.51	0.106	0.151	10.61	605.42
5.447	5.437	6	7.48	1.76	0.117	0.174	11.22	605.42
5.447	5.437	7	7.56	1.66	0.129	0.167	11.08	605.42
5.447	5.437	8	7.33	1.8	0.123	0.181	11.77	605.42
5.457	5.447	1	7.58	1.61	0.117	0.159	10.84	605.96
5.457	5.447	2	7.6	1.57	0.116	0.154	10.87	605.96
5.457	5.447	3	7.44	1.82	0.091	0.182	11.73	605.96
5.457	5.447	4	7.57	1.57	0.115	0.148	11.02	605.96
5.457	5.447	5	7.55	1.77	0.118	0.197	11.61	605.96
5.457	5.447	6	7.81	1.45	0.11	0.14	10.62	605.96
5.457	5.447	7	7.68	1.51	0.108	0.138	11.03	605.96
5.467	5.457	1	7.61	1.59	0.114	0.153	10.89	606.5
5.467	5.457	2	7.73	1.56	0.111	0.15	10.83	606.5
5.467	5.457	3	7.57	1.57	0.112	0.147	11.02	606.5
5.467	5.457	4	7.86	1.54	0.103	0.139	10.9	606.5
5.467	5.457	5	7.6	1.58	0.111	0.157	10.96	606.5
5.467	5.457	6	7.79	1.49	0.106	0.141	10.72	606.5
5.467	5.457	7	7.59	1.57	0.109	0.145	10.97	606.5
5.467	5.457	8	7.6	1.59	0.109	0.16	10.86	606.5
5.467	5.457	9	7.59	1.56	0.109	0.149	10.93	606.5
5.477	5.467	1	7.52	1.73	0.116	0.172	11.24	607.04
5.477	5.467	2	7.59	1.66	0.124	0.159	11.13	607.04
5.477	5.467	3	7.57	1.72	0.11	0.166	11.11	607.04
5.477	5.467	4	7.58	1.62	0.116	0.15	10.94	607.04
5.477	5.467	5	7.45	1.75	0.117	0.167	11.28	607.04
5.477	5.467	6	7.74	1.52	0.114	0.136	11.04	607.04
5.477	5.467	7	7.36	1.76	0.118	0.171	11.4	607.04
5.477	5.467	8	7.87	1.53	0.105	0.124	10.89	607.04
5.477	5.467	9	7.43	1.76	0.116	0.177	11.27	607.04
5.477	5.467	10	7.43	1.74	0.12	0.173	11.3	607.04
5.487	5.477	1	7.6	1.71	0.109	0.175	11.11	607.58
5.487	5.477	2	7.63	1.63	0.116	0.159	10.87	607.58
5.487	5.477	3	7.47	1.78	0.118	0.189	11.49	607.58
5.487	5.477	4	7.51	1.78	0.117	0.189	11.07	607.58
5.487	5.477	5	7.34	1.73	0.132	0.144	11.39	607.58
5.487	5.477	6	7.47	1.73	0.115	0.177	11.28	607.58
5.487	5.477	7	7.3	1.76	0.112	0.189	11.6	607.58
5.487	5.477	8	7.51	1.75	0.111	0.168	11.42	607.58
5.487	5.477	9	7.46	1.8	0.115	0.181	11.43	607.58
5.487	5.477	10	7.62	1.6	0.116	0.167	10.83	607.58
5.487	5.477	11	7.16	1.8	0.083	0.186	11.79	607.58
5.497	5.487	1	7.51	1.75	0.118	0.175	11.32	608.12
5.497	5.487	2	7.61	1.63	0.118	0.17	10.83	608.12
5.497	5.487	3	7.65	1.65	0.116	0.168	11.03	608.12
5.497	5.487	4	7.66	1.69	0.114	0.165	11.59	608.12
5.497	5.487	5	7.54	1.66	0.128	0.167	11.25	608.12
5.497	5.487	6	7.67	1.64	0.116	0.175	11.07	608.12
5.497	5.487	7	7.48	1.76	0.12	0.172	11.35	608.12
5.497	5.487	8	7.5	1.78	0.118	0.185	11.23	608.12
5.497	5.487	9	7.36	1.81	0.121	0.195	11.7	608.12
5.497	5.487	10	7.61	1.61	0.117	0.166	10.81	608.12
5.497	5.487	11	7.5	1.76	0.117	0.18	11.35	608.12
5.497	5.487	12	7.63	1.64	0.112	0.177	10.81	608.12
5.497	5.487	13	7.49	1.75	0.12	0.174	11.37	608.12
5.497	5.487	14	7.5	1.76	0.118	0.177	11.34	608.12
5.527	5.517	1	7.47	1.76	0.12	0.175	11.34	609.74
5.527	5.517	2	7.48	1.74	0.116	0.173	11.28	609.74
5.527	5.517	3	7.46	1.75	0.116	0.171	11.3	609.74
5.577	5.567	1	7.47	1.75	0.117	0.174	11.28	612.43
5.577	5.567	2	7.49	1.75	0.118	0.176	11.32	612.43
5.577	5.567	3	7.48	1.74	0.122	0.173	11.28	612.43

## Sheet: Table DR2
Table DR2: Averaged compositions for all chips per cm of sediment core
Depth in core (mbsf)		Composition (wt%)
Max	Min	MgO_avg	TiO2_avg	K2O_avg	P2O5_avg	FeO_avg	Weight glass (g)	Age (ka)
4.817	4.807	5.61	2.66	0.207	0.28	14.31		546.432
4.827	4.817	5.83	2.68	0.215	0.269	14.57		547.495
4.867	4.857	5.74	2.66	0.202	0.271	14.54	0.00123	551.749
4.877	4.867	6.19	2.59	0.201	0.29	14.44	0.00127	552.812
4.887	4.877	6	2.71	0.208	0.292	14.66	0.00312	553.876
4.897	4.887	5.78	2.83	0.209	0.3	14.99	0.00239	554.939
4.907	4.897	5.77	2.65	0.204	0.286	14.06	0.004	556.002
4.917	4.907	5.75	2.67	0.213	0.287	14.38		557.066
4.937	4.927	5.77	2.69	0.211	0.285	14.41	0.02149	559.193
4.957	4.947	6	2.55	0.207	0.276	14.12	0.04082	561.319
4.967	4.957	6	2.56	0.198	0.278	14.05		562.922
4.977	4.967	5.8	2.61	0.201	0.273	14.29	0.09433	564.535
4.987	4.977	5.91	2.6	0.199	0.275	14.19	0.15546	566.147
4.997	4.987	6.05	2.56	0.199	0.266	14		567.76
5.007	4.997	6.06	2.53	0.197	0.276	13.99	0.466	569.373
5.017	5.007	6.11	2.52	0.19	0.259	13.89	0.27851	570.985
5.027	5.017	5.87	2.63	0.208	0.291	14.31	0.04809	572.598
5.037	5.027	6.2	2.55	0.179	0.258	14.01		574.211
5.047	5.037	6.06	2.7	0.197	0.282	14.53	0.014178	575.823
5.057	5.047	6.07	2.59	0.185	0.273	14.1		577.436
5.067	5.057	7.09	2.05	0.144	0.208	12.66	0.00625	579.049
5.077	5.067	6.17	2.65	0.171	0.273	14.41		580.662
5.087	5.077	6.06	2.71	0.181	0.283	14.59	0.00484	582.274
5.097	5.087	6.25	2.54	0.179	0.262	14.14	0.0028	583.887
5.107	5.097	6.15	2.69	0.172	0.278	14.41	0.00495	585.5
5.117	5.107	6.02	2.69	0.176	0.275	14.39		587.112
5.127	5.117	6.25	2.53	0.168	0.266	13.99		588.725
5.137	5.127	5.98	2.77	0.189	0.283	14.73		590.083
5.147	5.137	5.9	2.61	0.178	0.263	14.07	0.00923	590.448
5.167	5.157	5.99	2.54	0.171	0.246	14	0.01632	591.18
5.187	5.177	6.06	2.6	0.169	0.257	14.14	0.01342	591.912
5.197	5.187	6.17	2.32	0.162	0.22	13.37	0.00962	592.278
5.207	5.197	6.28	2.36	0.159	0.225	13.41	0.0223	592.644
5.217	5.207	6.42	2.28	0.16	0.224	13.3	0.01843	593.01
5.227	5.217	6.45	2.17	0.153	0.214	13.02	0.02	593.376
5.237	5.227	7.41	1.68	0.117	0.152	11.36	0.05	593.986
5.247	5.237	7.33	1.79	0.123	0.154	11.76	0.07554	594.525
5.257	5.247	7.61	1.61	0.112	0.149	11.26	0.232	595.064
5.267	5.257	7.65	1.55	0.109	0.144	10.76	0.11	595.604
5.277	5.267	7.25	1.8	0.126	0.166	11.84	0.13	596.143
5.287	5.277	6.69	2.12	0.149	0.207	12.9	0.177	596.683
5.297	5.287	7.23	1.84	0.129	0.185	11.87	0.15765	597.222
5.307	5.297	7.58	1.64	0.111	0.149	11.31	0.10427	597.761
5.317	5.307	7.42	1.7	0.121	0.152	11.43	0.0369	598.301
5.327	5.317	7.72	1.58	0.107	0.136	11.03		598.84
5.337	5.327	7.62	1.62	0.108	0.145	11.34		599.38
5.347	5.337	7.96	1.45	0.1	0.132	10.65		599.919
5.357	5.347	7.61	1.66	0.115	0.159	11.2	0.04	600.458
5.367	5.357	7.69	1.52	0.112	0.143	10.99	0.025	600.998
5.377	5.367	7.74	1.5	0.108	0.148	10.84	0.04221	601.537
5.387	5.377	7.58	1.69	0.118	0.165	11.41	0.065	602.077
5.397	5.387	7.66	1.57	0.114	0.15	11.04		602.616
5.407	5.397	7.84	1.47	0.105	0.137	10.71		603.155
5.417	5.407	7.72	1.56	0.111	0.143	11.01		603.695
5.427	5.417	7.71	1.52	0.11	0.139	10.81	0.044	604.234
5.437	5.427	7.89	1.47	0.097	0.137	10.62	0.026	604.774
5.447	5.437	7.54	1.65	0.119	0.164	11.06	0.057	605.313
5.457	5.447	7.6	1.61	0.111	0.16	11.1	0.045	605.852
5.467	5.457	7.66	1.56	0.109	0.149	10.9		606.392
5.477	5.467	7.55	1.68	0.116	0.16	11.16	0.03642	606.931
5.487	5.477	7.46	1.73	0.113	0.175	11.3	0.02	607.471
5.497	5.487	7.55	1.71	0.118	0.175	11.22	0.036	608.01
5.527	5.517	7.47	1.75	0.117	0.173	11.31		609.628
5.577	5.567	7.48	1.75	0.119	0.174	11.29		612.325
